# Supplementary figures and images for: Co-localization of catalysts within a protein cage leads to efficient photochemical NADH and/or hydrogen production
Source: Royal Society of Chemistry journal article supplement (doi:10.1039/c6tb01175f), 2016-01-01

PC

P22-int

P22-xAEMA

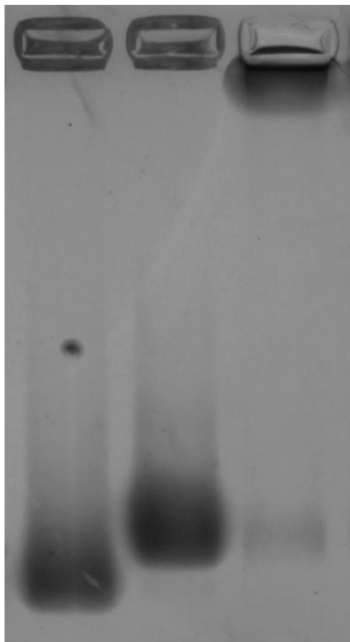

Supplement: c6tb01175f10.pdf [file c6tb01175f10.pdf]

**A**

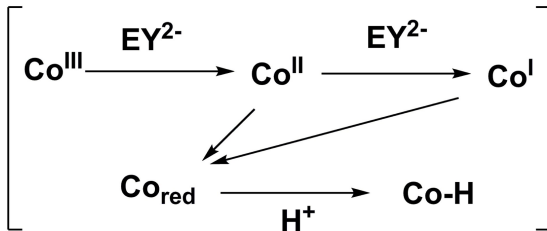

**B**

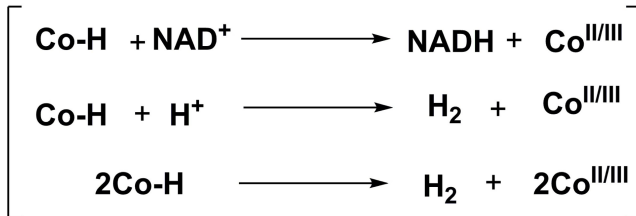

Supplement: c6tb01175f6.pdf [file c6tb01175f6.pdf]

**A**

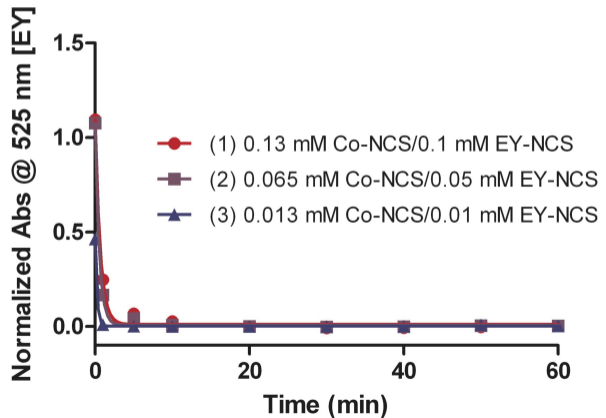

**B**

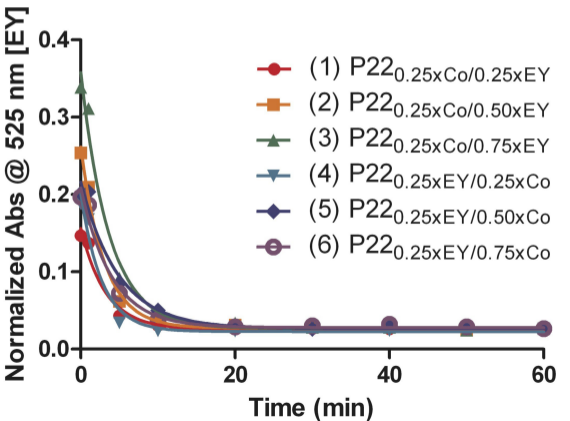

Supplement: c6tb01175f7.pdf [file c6tb01175f7.pdf]
